# Supplementary material
Source: Springer Nature journal article supplement (https://www.springermedizin.de/resource/supplementary/12985_2013_2313_MOESM2_ESM.pdf/9606510)

Viral spreading assay

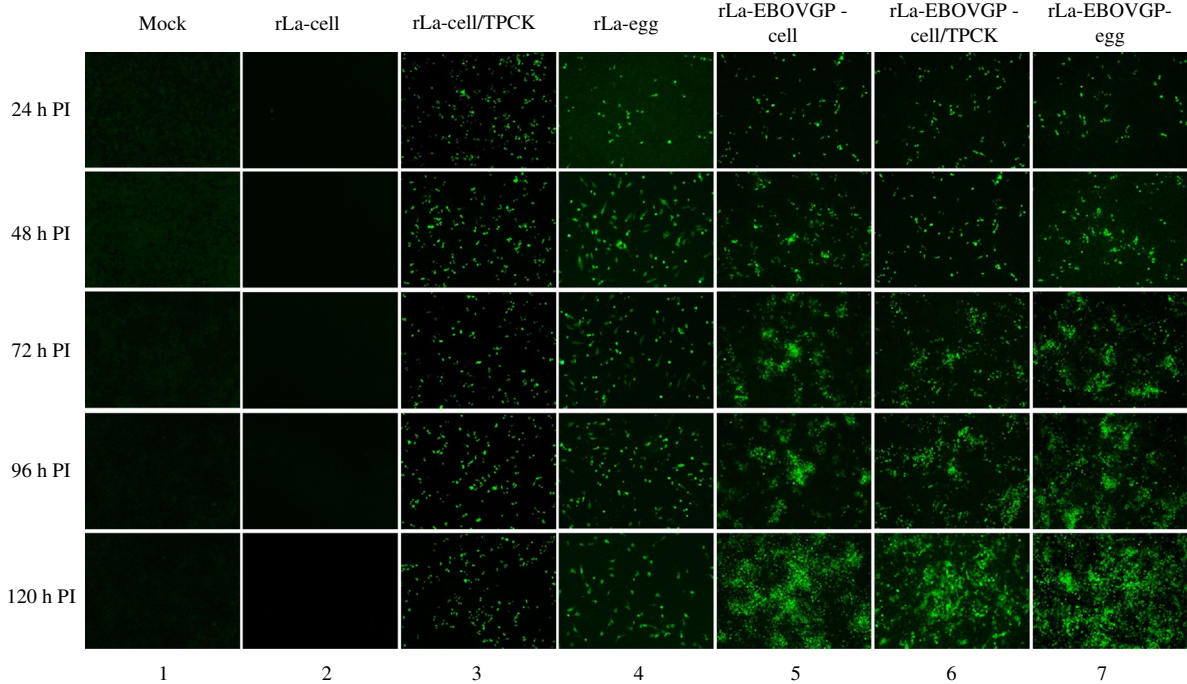

Supplement: MOESM2 [file 9606510]
